# Supplementary material for: WWW: Neuroscience Web Sites
Source: Atypon-hosted journal article supplement (doi:10.1187/cbe.06-02-0147), 2006-06-01
Supplement: updated_urls.pdf [file updated_urls.pdf]

Updated URLs

<http://www.med.uwo.ca/physiology/courses/sensesweb/> should be replaced by  
<http://www.physpharm.fmd.uwo.ca/undergrad/sensesweb/>

<http://www.med.uwo.ca/physiology/courses/medsweb/> should be replaced by  
<http://www.physpharm.fmd.uwo.ca/undergrad/medsweb/>.
